# Supplementary material for: Novel Microsatellite Loci, Cross-Species Validation of Multiplex Assays, and By-Catch Mitochondrial Genomes on Ochthebius Beetles from Supratidal Rockpools
Source: MDPI journal article supplement (doi:10.3390/insects14110881), 2023-11-15
Supplement: s1 [file s1]

# Supplementary Material

**Table S1.** Site location information and analysis performed on samples

| Locality                 | Coordinates<br>(LAT; LON) | Species                | Method                                               |
|--------------------------|---------------------------|------------------------|------------------------------------------------------|
| Denia (Spain)            | 38.833528;<br>0.138467    | <i>O. quadricollis</i> | Testing SSR markers<br>and multiplex<br>optimization |
| La Illeta (Spain)        | 38.431639;<br>-0.380675   | <i>O. quadricollis</i> | Testing SSR markers<br>and multiplex<br>optimization |
| Santa Pola (Spain)       | 38.197111;<br>-0.514417   | <i>O. lejolisii</i>    | Testing SSR markers<br>and multiplex<br>optimization |
| Cala Reona (Spain)       | 37.617328;<br>-0.712847   | <i>O. quadricollis</i> | Library sequenced and<br>Mitochondrial genome        |
|                          |                           | <i>O. subinteger</i>   | Testing SSR markers<br>and multiplex<br>optimization |
| Cala Pulgas (Spain)      | 37.469876;<br>-1.470352   | <i>O. lejolisii</i>    | Library sequenced and<br>Mitochondrial genome        |
|                          |                           | <i>O. quadricollis</i> | Testing SSR markers<br>and multiplex<br>optimization |
| Cala Conchas (Spain)     | 37.284133;<br>-1.730989   | <i>O. lejolisii</i>    | Testing SSR markers<br>and multiplex<br>optimization |
| Dwejra Bay (Malta)       | 36.051210;<br>14.189570   | <i>O. celatus</i>      | Testing SSR markers<br>and multiplex<br>optimization |
| Saint Paul's Bay (Malta) | 35.949400;<br>14.401740   | <i>O. celatus</i>      | Testing SSR markers<br>and multiplex<br>optimization |

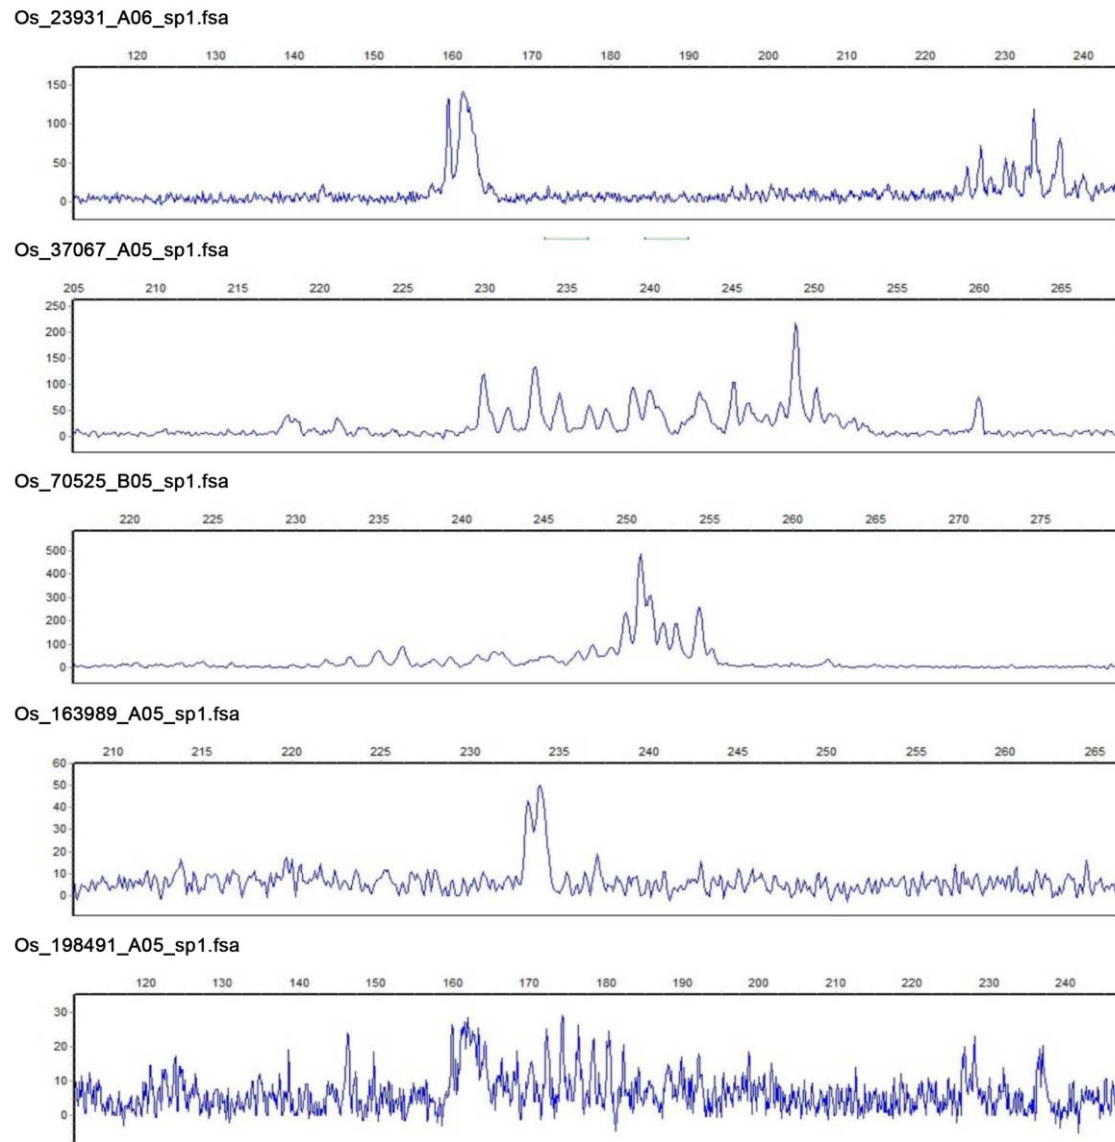

**Figure S1.** Example of five markers initially designed from the *O. lejolisi* library, where the electropherogram shows unclear amplification for *O. quadricollis* specimens.

**Table S2** (Excel format in a separate file). Details and sequences of the loci selected from the *O. lejolisi* and *O. quadricollis* libraries (source of samples in Table S1) for the amplification test.
